# Supplementary material for: DPP8/9 inhibitors are universal activators of functional NLRP1 alleles
Source: PubMed Central journal article supplement (PMC6683174; doi:10.1038/s41419-019-1817-5), 2019-08-05
Supplement: 41419_2019_1817_MOESM1_ESM.pdf [file 41419_2019_1817_MOESM1_ESM.pdf]

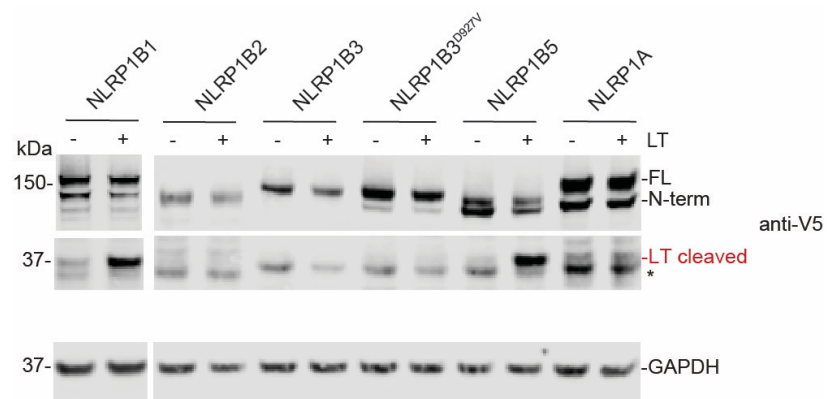

**Fig S1. Mouse NLRP1 allele sensitivity to LT cleavage in cells.** HEK 293T cells were transiently transfected with plasmids encoding the indicated N-terminally V5-GFP-tagged mouse NLRP1 alleles (2  $\mu$ g, 48 h). Cells were then treated with LT (1  $\mu$ g/mL, 6 h) before lysates were harvested and evaluated by immunoblotting. The asterisk indicates a background band. N-term, N-terminus.

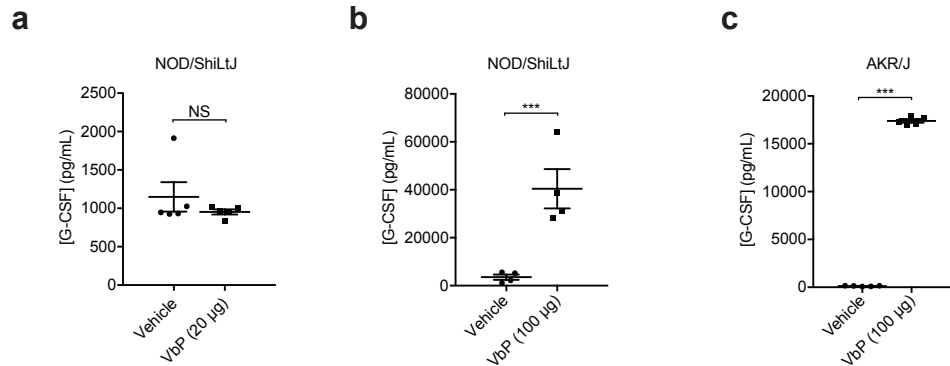

**Fig S2. NOD/ShiLtJ and AKR/J are sensitive to VbP.** (a-c) Vehicle or the indicated concentration of VbP was administered intraperitoneally to NOD/ShiLtJ (a,b) or AKR/J (c) mice. Serum G-CSF was assessed after 6 h by ELISA. Data are means  $\pm$  SEM, n = 4-5 mice/group. \*\*\*\*p < 0.001 by two-sided Student's *t*-test for vehicle versus treated groups. NS, not significant. As NLRP1B3 is an inactive allele, the cytokine induction in these mice is likely due to activation of NLRP1A. NOD/ShiLtJ mice are less sensitive to VbP than C57BL/6J mice, as a lower dose (20  $\mu$ g/mouse, i.p.) elevates G-CSF levels in C57BL/6J mice<sup>22</sup> but not in NOD/ShiLtJ mice (a).
